### 1498 A Ten-Year Observational Study of The Use of Two-Way Catheters Post-Transurethral Resection of The Prostate Without the Use of Post-Op Irrigation

L. Kretzmer<sup>1</sup>, A. Damola<sup>1</sup>, M. Sandher<sup>1</sup>, W. Martin<sup>1,2</sup>, S. Ali Ehsanullah<sup>1</sup>, A. Jones<sup>1</sup>, S. Manirajan<sup>1,2</sup>, S. Cakir<sup>1,2</sup>, J. Gao<sup>1,2</sup>, A. Ginepri<sup>1</sup>, S. Singh<sup>1</sup>, I. Apakama<sup>1</sup>

<sup>1</sup>George Eliot Hospital, Nuneaton, United Kingdom, <sup>2</sup>Warwick Medical School, Warwick, United Kingdom

Over 15,000 transurethral resections of the prostate (TURP) are performed yearly in the UK. It is therefore vital that peri-operative care is optimised. Our centre favours the use of two-way catheters post-operatively without continuous bladder irrigation (CBI).

**Aim:** To evaluate our practice of using two-way catheters without irrigation post-TURP and to determine impact on patient care compared to standard three-way catheterization. Our primary outcome was duration of admission, but multiple secondary outcomes were also analysed.

**Method:** This was a prospective observational study. Every patient undergoing TURP at our centre from 2009 to 2019 was included. Prospective patient data were collected pertaining to peri-operative factors. This data was then compared with data published in the NICE guidance pertaining to TURP.

**Results:** 687 patients underwent TURP at our centre between 2009-2019. The average age of patients was 71.42 ( $\pm 7.89$ ). 87.17% ( $n = 598$ ) had two-way catheters placed post-operatively. Average duration of admission was 1.61 ( $\pm 1.35$ ) days. TWOC was successful in 93.74% ( $n = 644$ ). Complication rate was 8.73% ( $n = 60$ ), reduced in comparison to other units. Furthermore, when compared to other centres, our method reduced lengths of admission and transfusion rates (1.6 days vs. 3.1 days and 0.87% vs. 2.83% respectively).

**Conclusions:** Our method preserves patient safety and is associated with reduced length of admission. It also has cost-saving benefits and a reduced post-operative period of catheterisation. We recommend this practice to the wider urological community.
